# Supplementary material
Source: HighWire-hosted journal article supplement (https://www.jrheum.org/highwire/filestream/36930/field_highwire_adjunct_files/0/190303DataSuppl.pdf)
Supplement: 190303DataSuppl.pdf [file 190303DataSuppl.pdf]

## ONLINE SUPPLEMENTARY MATERIAL

**Supplementary Table S1.** Baseline and time-varying predictors of failure to apply **T2T-REM** (according to CDAI and SDAI) during 2-year follow-up in the RA BIODAM Cohort.

|                                     | CDAI                                     |                                              | SDAI                                     |                                              |
|-------------------------------------|------------------------------------------|----------------------------------------------|------------------------------------------|----------------------------------------------|
|                                     | Baseline model<br>OR (95% CI)<br>(N=551) | Longitudinal model<br>OR (95% CI)<br>(N=540) | Baseline model<br>OR (95% CI)<br>(N=549) | Longitudinal model<br>OR (95% CI)<br>(N=540) |
| Age (years)                         | ¥                                        | ¥                                            | ¥                                        | <b>1.01 (1.00; 1.01)</b>                     |
| Gender (female)                     | <b>1.26 (1.05; 1.52)</b>                 | <b>1.30 (1.03; 1.64)</b>                     | <b>1.21 (1.01; 1.46)</b>                 | <b>1.28 (1.02; 1.60)</b>                     |
| Disease duration (years)            | ¥                                        | ¥                                            | ¥                                        | ¥                                            |
| Education (years)                   | <b>0.97 (0.95; 0.99)</b>                 | <b>0.95 (0.93; 0.98)</b>                     | <b>0.96 (0.94; 0.98)</b>                 | <b>0.95 (0.93; 0.98)</b>                     |
| Number of comorbidities             | ¥                                        | ¥                                            | ¥                                        | ¥                                            |
| Current smoker                      | †                                        | †                                            | †                                        | †                                            |
| Type of centre (academic)           | <b>1.21 (1.02; 1.43)</b>                 | ¥                                            | †                                        | †                                            |
| RF positivity                       | †                                        | ¥                                            | †                                        | †                                            |
| ACPA positivity                     | ¥                                        | <b>0.79 (0.64; 0.98)</b>                     | ¥                                        | <b>0.80 (0.65; 0.98)</b>                     |
| RF and/or ACPA positivity           | ¥                                        | †                                            | ¥                                        | ¥                                            |
| PGA (0-10)                          | ¥                                        | ¥                                            | ¥                                        | ¥                                            |
| PhGA (0-10)                         | †                                        | ¥                                            | ¥                                        | ¥                                            |
| Swollen joint count (0-44)          | †                                        | <b>0.87 (0.85; 0.89)</b>                     | †                                        | <b>0.88 (0.86; 0.90)</b>                     |
| Tender joint count (0-53)           | ¥                                        | ¥                                            | ¥                                        | ¥                                            |
| ESR (mm/h)                          | †                                        | ¥                                            | †                                        | ¥                                            |
| CRP (mg/L)                          | ¥                                        | ¥                                            | †                                        | ¥                                            |
| HAQ                                 | <b>1.26 (1.12; 1.41)</b>                 | ¥                                            | <b>1.28 (1.14; 1.44)</b>                 | ¥                                            |
| Number of previous csDMARDs         | ¥                                        | <b>1.13 (1.02; 1.24)</b>                     | ¥                                        | ¥                                            |
| Previous treatment with any csDMARD | ¥                                        | ¥                                            | ¥                                        | ¥                                            |

†: not selected from the univariable analysis ( $p > 0.20$ ); ¥: not significant in the multivariable analysis ( $p > 0.05$ ). Country added as a covariate in all univariable models and in the final multivariable model. Final models also adjusted for type of treatment (csDMARDs and/or bDMARDs)

**Supplementary Table S2.** Baseline and time-varying predictors of failure to apply **T2T-LDA** (according to CDAI and SDAI) during 2-year follow-up in the RA BIODAM Cohort.

|                                     | CDAI                                     |                                              | SDAI                                     |                                              |
|-------------------------------------|------------------------------------------|----------------------------------------------|------------------------------------------|----------------------------------------------|
|                                     | Baseline model<br>OR (95% CI)<br>(N=538) | Longitudinal model<br>OR (95% CI)<br>(N=555) | Baseline model<br>OR (95% CI)<br>(N=538) | Longitudinal model<br>OR (95% CI)<br>(N=555) |
| Age (years)                         | ¥                                        | <b>1.01 (1.00; 1.02)</b>                     | ¥                                        | ¥                                            |
| Gender (female)                     | †                                        | †                                            | †                                        | †                                            |
| Disease duration (years)            | ¥                                        | ¥                                            | ¥                                        | †                                            |
| Education (years)                   | <b>0.97 (0.95; 0.99)</b>                 | ¥                                            | <b>0.97 (0.95; 1.00)</b>                 | ¥                                            |
| Number of comorbidities             | ¥                                        | ¥                                            | ¥                                        | ¥                                            |
| Current smoker                      | †                                        | †                                            | †                                        | †                                            |
| Type of centre (academic)           | ¥                                        | ¥                                            | ¥                                        | ¥                                            |
| RF positivity                       | ¥                                        | ¥                                            | ¥                                        | ¥                                            |
| ACPA positivity                     | <b>0.62 (0.51; 0.75)</b>                 | <b>0.62 (0.52; 0.46)</b>                     | <b>0.63 (0.51; 0.77)</b>                 | <b>0.64 (0.53; 0.78)</b>                     |
| RF and/or ACPA positivity           | ¥                                        | ¥                                            | ¥                                        | ¥                                            |
| PGA (0-10)                          | ¥                                        | ¥                                            | ¥                                        | ¥                                            |
| PhGA (0-10)                         | ¥                                        | ¥                                            | ¥                                        | ¥                                            |
| Swollen joint count (0-44)          | †                                        | <b>0.97 (0.95; 0.99)</b>                     | †                                        | <b>0.97 (0.95; 0.99)</b>                     |
| Tender joint count (0-53)           | <b>1.02 (1.01; 1.03)</b>                 | <b>1.02 (1.01; 1.04)</b>                     | <b>1.02 (1.01; 1.03)</b>                 | <b>1.02 (1.01; 1.03)</b>                     |
| ESR (mm/h)                          | ¥                                        | †                                            | †                                        | †                                            |
| CRP (mg/L)                          | ¥                                        | ¥                                            | †                                        | †                                            |
| HAQ                                 | <b>1.18 (1.02; 1.36)</b>                 | ¥                                            | <b>1.20 (1.04; 1.39)</b>                 | <b>1.40 (1.22; 1.61)</b>                     |
| Number of previous csDMARDs         | ¥                                        | ¥                                            | ¥                                        | ¥                                            |
| Previous treatment with any csDMARD | ¥                                        | ¥                                            | ¥                                        | ¥                                            |

†: not selected from the univariable analysis ( $p > 0.20$ ); ¥: not significant in the multivariable analysis ( $p > 0.05$ ). Country added as a covariate in all univariable models and in the final multivariable model. Final models also adjusted for type of treatment (csDMARDs and/or bDMARDs)
